# Supplementary material
Source: PubMed Central journal article supplement (PMC4255364)
Supplement: NIHMS597925-supplement-supporting_info.pdf [file NIHMS597925-supplement-supporting_info.pdf]

*Supporting Information for*

**A Magic-Angle Spinning NMR Method for the Site-Specific  
Measurement of Proton Chemical-Shift Anisotropy in  
Biological and Organic Solids**

*Guangjin Hou,<sup>[a] [b]</sup> Ph.D., NMR Spectroscopist; Rupal Gupta,<sup>[a]</sup> Ph.D., Postdoctoral Fellow;*

*Tatyana Polenova,<sup>\*[a] [b]</sup> Ph.D., Professor, and Alexander J. Vega<sup>\*, [a]</sup> Ph.D., Research Scientist*

[a] Department of Chemistry and Biochemistry, University of Delaware, Newark, Delaware  
19716, United States

[b] Pittsburgh Center for HIV Protein Interactions, University of Pittsburgh School of Medicine,  
Pittsburgh, Pennsylvania 15261, United States

Corresponding Authors:

lexvega@udel.edu; Phone +1-302-831-8624; Fax: +1-302-831-6335

tpolenov@udel.edu; Phone +1-302-831-1968; Fax: +1-302-831-6335

Dedicated to the 70th birthday of Professor Dr. Shimon Vega

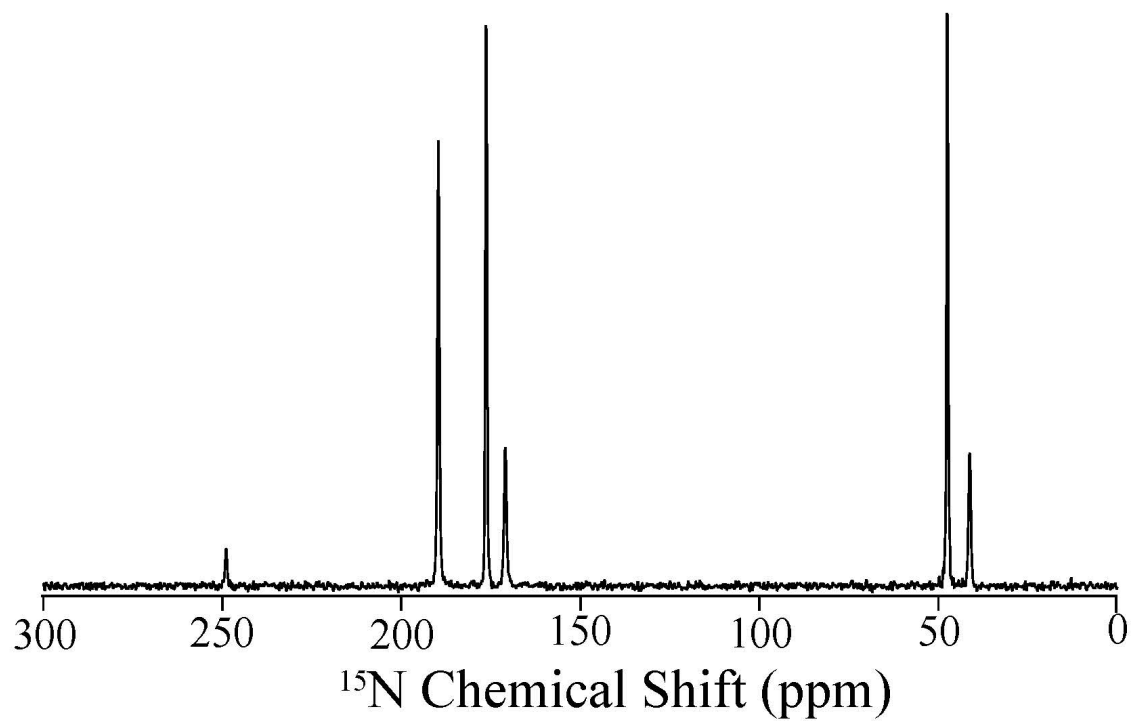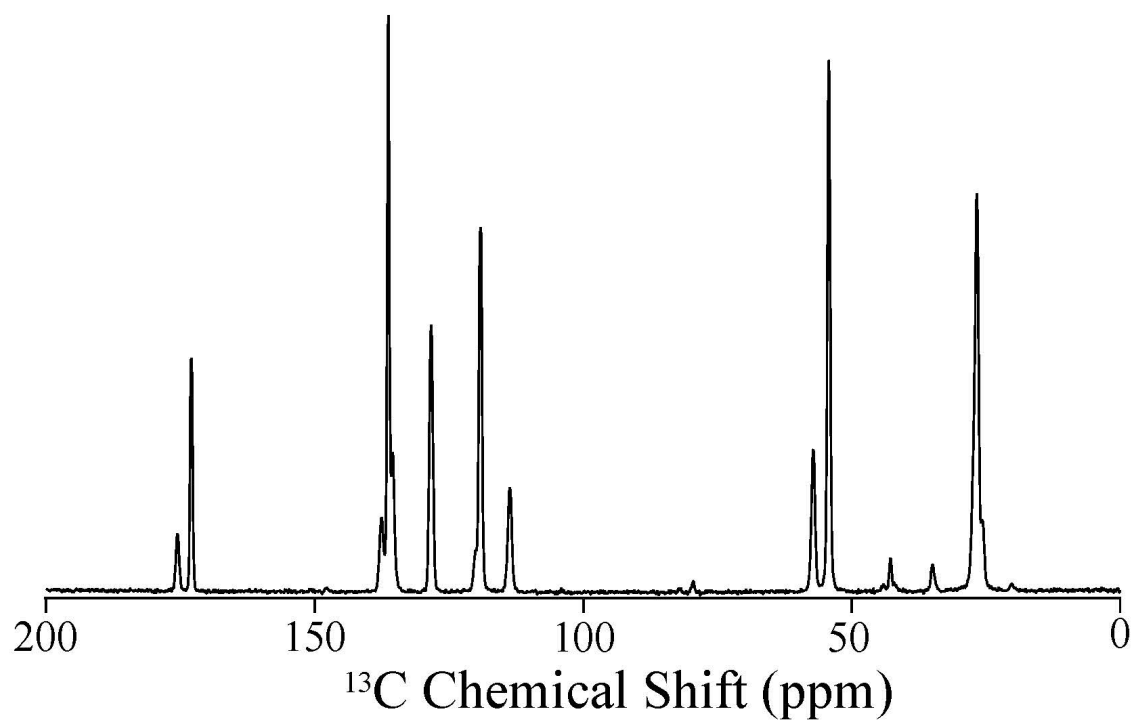

**Figure S1.**  $^{13}\text{C}$  and  $^{14}\text{N}$  spectra of the mixture of cationic and neutral histidine crystallites.

**Table S1.**  $^{15}\text{N}$  and  $^{13}\text{C}$  chemical shifts (ppm) of cationic and neutral histidine as reported by Li and Hong<sup>[1]</sup> and as measured in the present work.

|                           | cationic histidine |              | neutral histidine |              |
|---------------------------|--------------------|--------------|-------------------|--------------|
|                           | Li&Hong            | present work | Li&Hong           | present work |
| $^{15}\text{NH}_4$        | 47.6               | 47.5         | 41.5              | 41.3         |
| $^{15}\text{N}\delta 1$   | 190.0              | 189.7        | 249.4             | 249.0        |
| $^{15}\text{N}\epsilon 2$ | 176.3              | 176.3        | 171.1             | 171.0        |
| $^{13}\text{C}'$          | 173.2              | 173          | 175.6             | 175.5        |
| $^{13}\text{C}\alpha$     | 54.1               | 54.2         | 57.0              | 57.1         |
| $^{13}\text{C}\beta$      | 26.0               | 25.5         | 27.0              | 26.7         |
| $^{13}\text{C}\gamma$     | 128.7              | 128.4        | 137.7             | 137.6        |
| $^{13}\text{C}\epsilon 1$ | 136.3              | 136.3        | 135.3             | 135.4        |
| $^{13}\text{C}\delta 2$   | 119.4              | 119.3        | 113.6             | 113.7        |

**Table S2.**  $^1\text{H}$  isotropic chemical shifts (ppm) of cationic histidine as reported by Li and Hong<sup>[1]</sup> and as presently calculated by DFT.

|                          | Li&Hong | DFT  |
|--------------------------|---------|------|
| $^1\text{H-N}\delta 1$   | 16.8    | 15.8 |
| $^1\text{H-N}\epsilon 2$ | 12.6    | 11.7 |
| $^1\text{H-C}\epsilon 1$ | 9.3     | 7.8  |
| $^1\text{H-C}\delta 2$   | 8.0     | 7.4  |
| $^1\text{H-C}\alpha$     | 3.5     | 3.4  |

#### Reference

[1] S. Li, M. Hong, *J. Am. Chem. Soc.* **2011**, 133, 1534–1544.
